# Supplementary material for: Suppression of leaky expression of adenovirus genes by insertion of microRNA-targeted sequences in the replication-incompetent adenovirus vector genome
Source: PubMed Central journal article supplement — Mol Ther Methods Clin Dev. 2014 Sep 3;1:14035–. doi: 10.1038/mtm.2014.35 (PMC4362365; doi:10.1038/mtm.2014.35), 2014-09-03

1 **Supplementary methods**

2 **Cells.**

3 K562 cells (a human chronic myelogenous leukemia cell line) were cultured in Dulbecco's  
4 modified Eagle's medium (DMEM) supplemented with 10% fetal calf serum (FCS) and  
5 antibiotics.

6

7 ***In vitro* Ad gene expression analysis in K562 cells.**

8 K562 cells were seeded onto 12-well plates at  $1 \times 10^5$  cells/well. On the following day, cells  
9 were transduced with Ad vectors at an MOI of 100 and harvested 12 h after transduction. After  
10 total RNA isolation, mRNA levels of Ad genes were determined by real-time RT-PCR.

11

12

13 **Supplementary Figure S1**

14 **Suppression of the leaky expression of Ad genes in cultured cells.** K562 cells were  
15 transduced with Ad vectors at an MOI of 100 and harvested 12 h after transduction. The Ad  
16 gene expression levels were determined by real-time RT-PCR. The data are expressed as the  
17 mean values  $\pm$  S.D. (n=4). \*p<0.05 in comparison with Ad-L2.

18

19 **Supplementary Figure S2**

20 **The leaky expression of Ad genes in the mouse liver and spleen following intravenous**  
21 **administration of the Ad vectors.** (A) The Ad gene expression levels in the liver were  
22 determined 2 days following intravenous administration of Ad vectors. (B) The Ad gene  
23 expression levels in the liver and spleen were determined 2 days following intravenous  
24 administration of Ad-L2. The data are expressed as the mean values  $\pm$  S.D. (n=5-6).

25

26 **Supplementary Figure S3**

27 **Chemokine mRNA levels in the liver after administration of Ad-L2 and**  
28 **Ad-E4-122aT-L2.** C57BL/6 mice were treated with Ad vectors at  $1 \times 10^{10}$  IFU/mouse. Ten days  
29 after administration, chemokine mRNA levels in the liver were determined by real-time RT-PCR.  
30 The data are expressed as the mean values  $\pm$  S.D. (n=3-6).

**Supplementary Table S1 Oligonucleotide sequences.**

| <b>Ad-E2A-122aT</b>       |                                                                                                           |
|---------------------------|-----------------------------------------------------------------------------------------------------------|
| E2A-3'-UTR-F              | 5'-accagcacactgggtt-3'                                                                                    |
| E2A-3'-UTR-R              | 5'-aaccagtgtgctggt-3'                                                                                     |
| E2A-miR-122aT-BstXI-S3    | 5'- <u>acaaacaccattgtcacactccacagcac</u> aaacaccattgtcacactccattaattaacagactagttgtg-3'                    |
| E2A-miR-122aT-BstXI-AS3   | 5'-actagtctgttaattaatgagtgtagacaatggtgtttgtgctgtggagtgtgacaatggtgtttgtcaca-3'                             |
| E2A-miR-122aT-BstXI-S4    | 5'- <u>acaaacaccattgtcacactccag</u> gacacaaacaccattgtcacactcca-3'                                         |
| E2A-miR-122aT-BstXI-AS4   | 5'-ctagtgagtgtagacaatggtgtttgtgcctggagtgtgacaatggtgtttgat-3'                                              |
| <b>Ad-E4-122aT</b>        |                                                                                                           |
| E4-3'-UTR-F1              | 5'-aatttcaagtcattttcattcagtagtatagccccaccaccacatagcttatacagatcaccgtaccttaatca<br>aactaggtaccacctgccacc-3' |
| E4-3'-UTR-R1              | 5'-gggaggtggcaggtgttacctagtttgattaaggtacggtgatctgtataagctatgtggtggggctata<br>ctactgaatgaaaaatgactga-3'    |
| E4-3'-UTR-F2              | 5'-catgcccgcgtatcacagaaccctagtattcaacctgccacc-3'                                                          |
| E4-3'-UTR-R2              | 5'-gggaggtggcaggttgaataactagggttctgtgatagcggccgcaggttac-3'                                                |
| E4-miR-122aT-S1           | 5'-ggcc <u>acaaacaccattgtcacactccacag</u> cacaaacaccattgtcacactccattaattaagcggtag-3'                      |
| E4-miR-122aT-AS1          | 5'-cgcttaattaatgagtgtagacaatggtgtttgtgctgtggagtgtgacaatggtgtttgt-3'                                       |
| E4-miR-122aT-S2           | 5'- <u>acaaacaccattgtcacactccag</u> gacacaaacaccattgtcacactccagtag-3'                                     |
| E4-miR-122aT-AS2          | 5'- <u>tggagtgtgacaatggtgtttgtgcctg</u> gagtgtgacaatggtgtttgat-3'                                         |
| <b>Ad-pIX-122aT</b>       |                                                                                                           |
| pIX-miR-122aT-S1          | 5'-ctagctaaacaaacaccattgtcacactccacagcacaaacaccattgtcacactccagaattccagggtacc-3'                           |
| pIX-miR-122aT-AS1         | 5'-ctagggtaccctggaattctgagtgtagacaatggtgtttgtgctgtggagtgtgacaatggtgtttgttag-3'                            |
| pIX-miR-122aT-S2          | 5'-aattgacaaacaccattgtcacactccagacacaaacaccattgtcacactccaggtac-3'                                         |
| pIX-miR-122aT-AS2         | 5'-ctggagtgtgacaatggtgtttgtgcctggagtgtgacaatggtgtttgtc-3'                                                 |
| <b>Ad-E2A-142-3pT</b>     |                                                                                                           |
| E2A-miR-142-3pT-BstXI-S3  | 5'- <u>tccataaagtag</u> gaaacactacacagctccataaagtaggaaacactacattaattaacagactagttgtg-3'                    |
| E2A-miR-142-3pT-BstXI-AS3 | 5'-actagtctgttaattaatgtagtgtttcctactttatggagctgtgtagtgtttcctactttatggacaca-3'                             |
| E2A-miR-142-3pT-BstXI-S4  | 5'- <u>tccataaagtag</u> gaaacactacagactccataaagtaggaaacactaca-3'                                          |
| E2A-miR-142-3pT-BstXI-AS4 | 5'-ctagtgtagtgtttcctactttatggagctcctgtagtgtttcctactttatggaat-3'                                           |
| <b>Ad-E4-142-3pT</b>      |                                                                                                           |
| E4-miR-142-3pT-S1         | 5'-ggcctccataaagtaggaaacactacacagctccataaagtaggaaacactacattaattaagcggtag-3'                               |
| E4-miR-142-3pT-AS1        | 5'-cgcttaattaatgtagtgtttcctactttatggagctgtgtagtgtttcctactttatgga-3'                                       |
| E4-miR-142-3pT-S2         | 5'- <u>tccataaagtag</u> gaaacactacagactccataaagtaggaaacactacagtag-3'                                      |
| E4-miR-142-3pT-AS2        | 5'-tgtagtgtttcctactttatggagctcctgtagtgtttcctactttatggaat-3'                                               |

| <b>Ad-pIX-142-3pT</b> |                                                                                         |
|-----------------------|-----------------------------------------------------------------------------------------|
| pIX-miR-142-3pT-S1    | 5'-ctagctaat <u>ccataaagtaggaaacactacacagctccataaagtaggaaacactacagaattccaggtacc</u> -3' |
| pIX-miR-142-3pT-AS1   | 5'-ctaggtaccctggaattctgtagtgttctactttatggagctgtagtgttctactttatggattag-3'                |
| pIX-miR-142-3pT-S2    | 5'-aattgcataaagtaggaaacactacaggactccataaagtaggaaacactacaggtac-3'                        |
| pIX-miR-142-3pT--AS2  | 5'-ctgtagtgttctactttatggagtctgtagtgttctactttatggac-3'                                   |

Underlines indicate miRNA-targeted sequences.

**Supplementary Table S2 Sequences of primers for IFN- $\gamma$  and chemokines.**

| <b>Gene</b>        | <b>Forward primer</b>                | <b>Reverse primer</b>                 | <b>Amplicon size</b> |
|--------------------|--------------------------------------|---------------------------------------|----------------------|
| IFN- $\gamma$      | 5'-ATG AAC GCT ACA CAC TGC ATC-3'    | 5'-TCT AGG CTT TCA ATG ACT GTG C-3'   | 92 bp                |
| CCL2               | 5'-TTA AAA ACC TGG ATC GGA ACC AA-3' | 5'-GCA TTA GCT TCA GAT TTA CGG GT-3'  | 121 bp               |
| CCL3               | 5'-TTC TCT GTA CCA TGA CAC TCT GC-3' | 5'-CGT GGA ATC TTC CGG CTG TAG-3'     | 100 bp               |
| CCL4               | 5'-TTC CTG CTG TTT CTC TTA CAC CT-3' | 5'-CTG TCT GCC TCT TTT GGT CAG-3'     | 121 bp               |
| CCL5               | 5'-GCT GCT TTG CCT ACC TCT CC-3'     | 5'-TCG AGT GAC AAA CAC GAC TGC-3'     | 104 bp               |
| CXCL2              | 5'-CGC TGT CAA TGC CTG AAG AC-3'     | 5'-ACA CTC AAG CTC TGG ATG TTC TTG-3' | 62 bp                |
| CX <sub>3</sub> CL | 5'-ACG AAA TGC GAA ATC ATG TGC-3'    | 5'-CTG TGT CGT CTC CAG GAC AA-3'      | 120 bp               |
| CXCL10             | 5'-CCA AGT GCT GCC GTC ATT TTC-3'    | 5'-TCC CTA TGG CCC TCA TTC TCA-3'     | 133 bp               |

# Figure S1

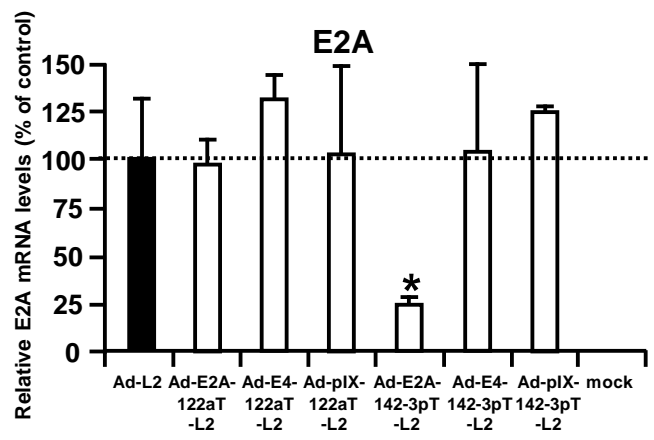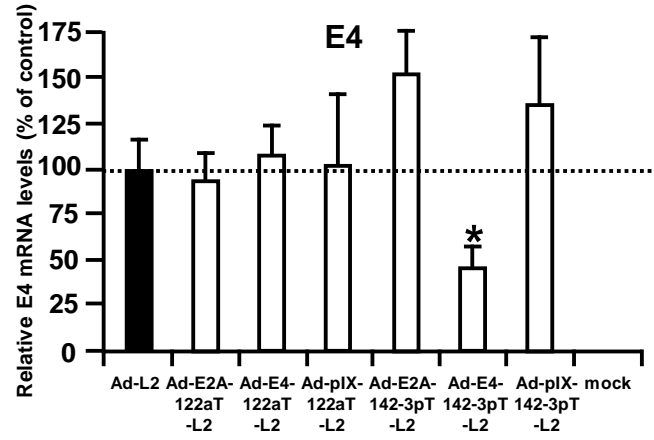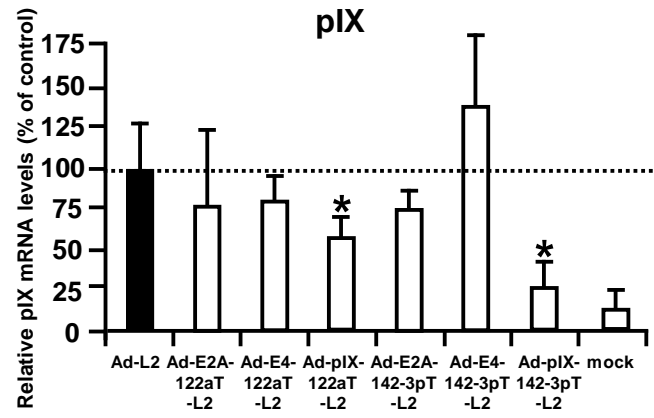

Figure S2

Figure S2A

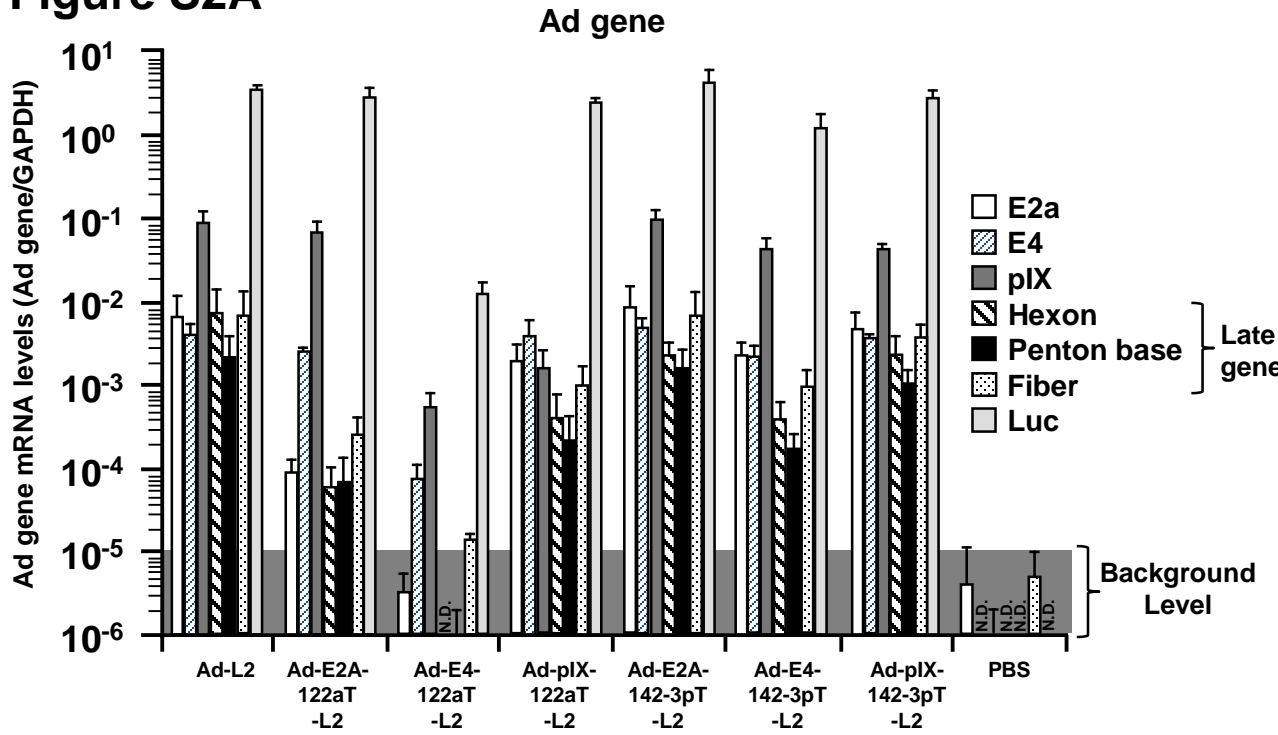

Figure S2B

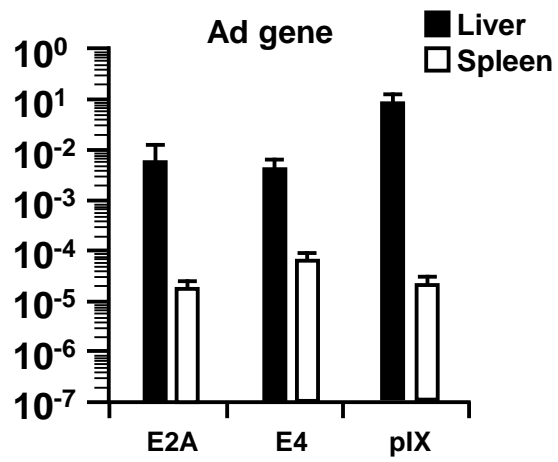

Figure S3

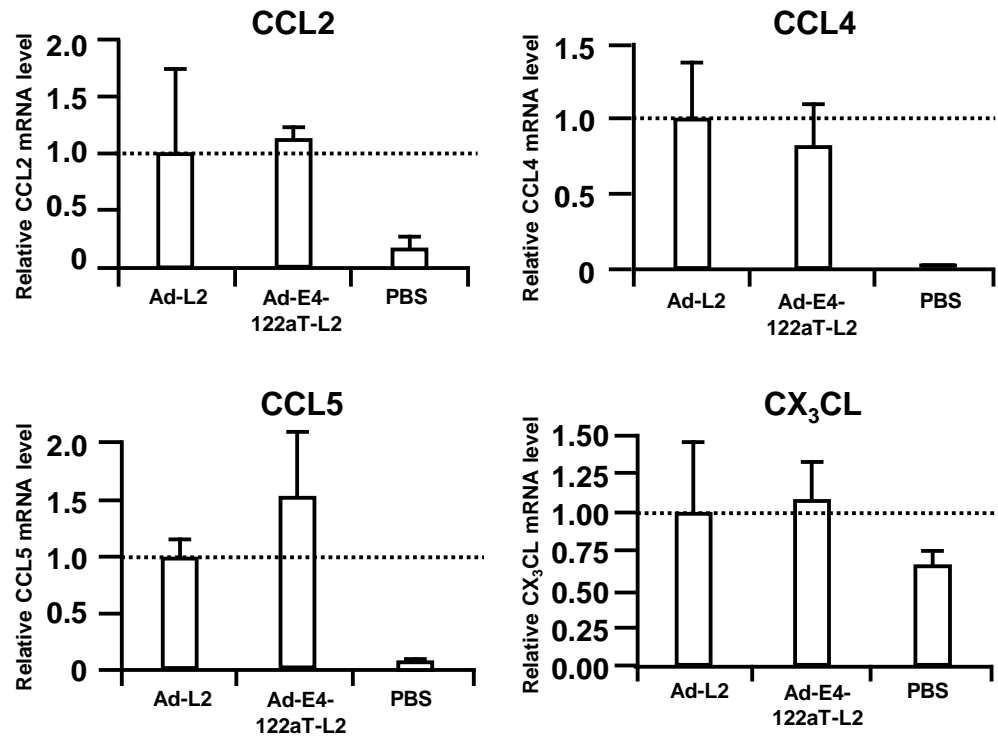

Supplement: mtm201435-s1.pdf [file mtm201435-s1.pdf]
